# Supplementary material for: Direct synthesis of layered double hydroxide nanosheets for efficient siRNA delivery
Source: Royal Society of Chemistry journal article supplement (doi:10.1039/c6ra19225d), 2016-01-01
Supplement: c6ra19225d1.pdf [file c6ra19225d1.pdf]

# Direct synthesis of layered double hydroxide nanosheets for efficient siRNA delivery

L. Li<sup>a\*</sup>, Z. Gu<sup>b</sup>, W.Y. Gu<sup>a</sup> and Z. P. Xu<sup>a\*</sup>

<sup>a</sup> Australian Institute for Bioengineering and Nanotechnology, The University of Queensland, Brisbane, QLD 4072, Australia.

<sup>b</sup> School of Chemical Engineering, University of New South Wales, Sydney, NSW 2052

Fax: 61 7 33463973; Tel: 617 33463809; Email: [gordonxu@uq.edu.au](mailto:gordonxu@uq.edu.au); [lli2@uq.edu.au](mailto:lli2@uq.edu.au);

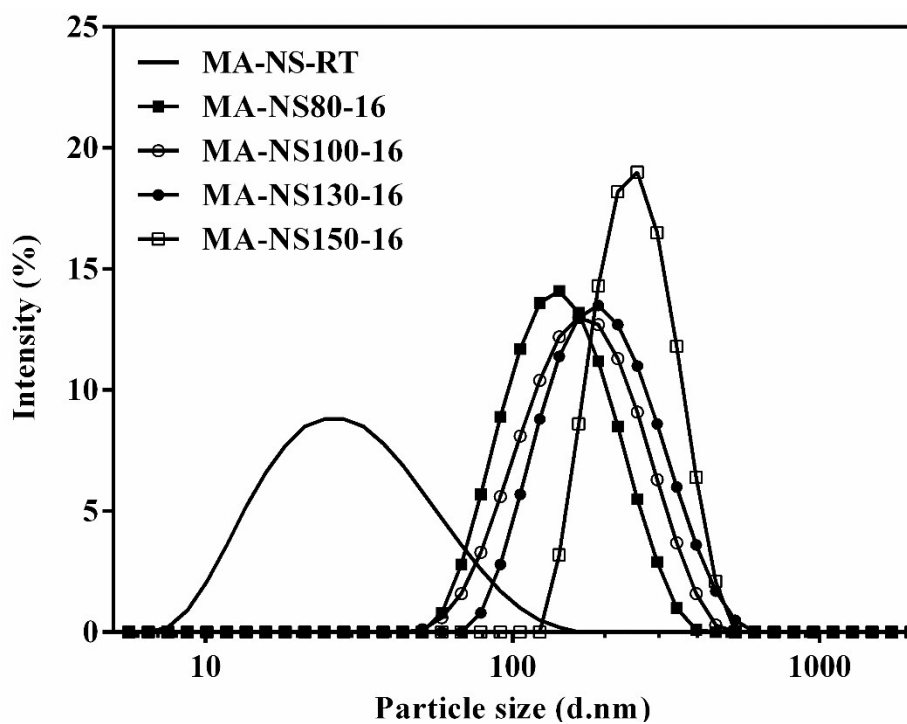

**Fig. S1** The particle size distribution of MA-NS-16 with or without hydrothermal treatment for 16 h at the different temperature

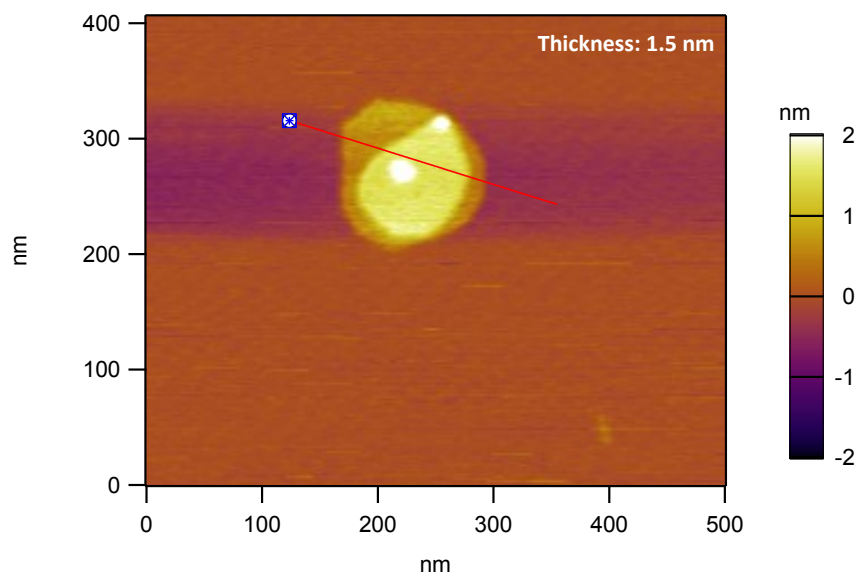

**Fig. S2** AFM image of MA-NS100-48 sample after hydrothermal treatment at 100 °C for 48h

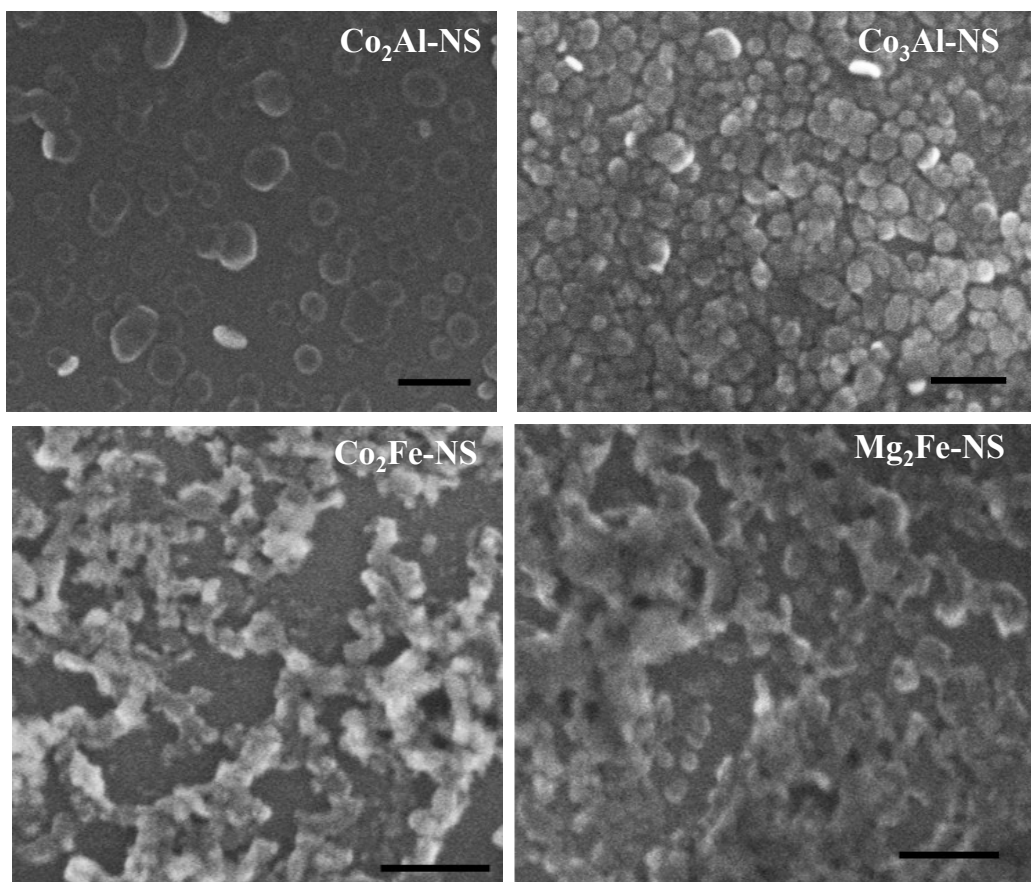

**Fig. S3** SEM images of LDH nanosheets containing different metal cation. The scale is 100 nm

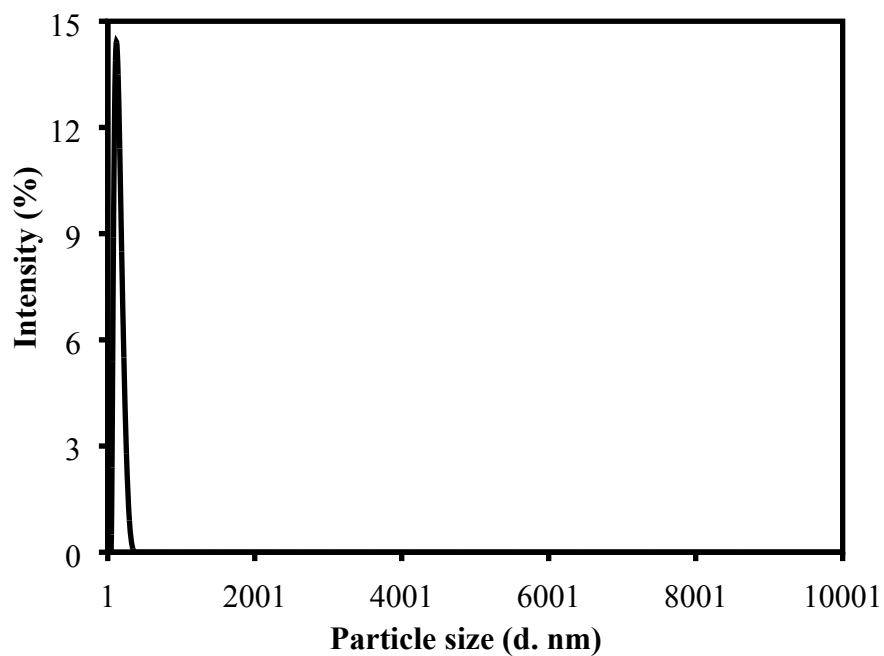

**Fig. S4** The particle size distribution of MA-NP sample

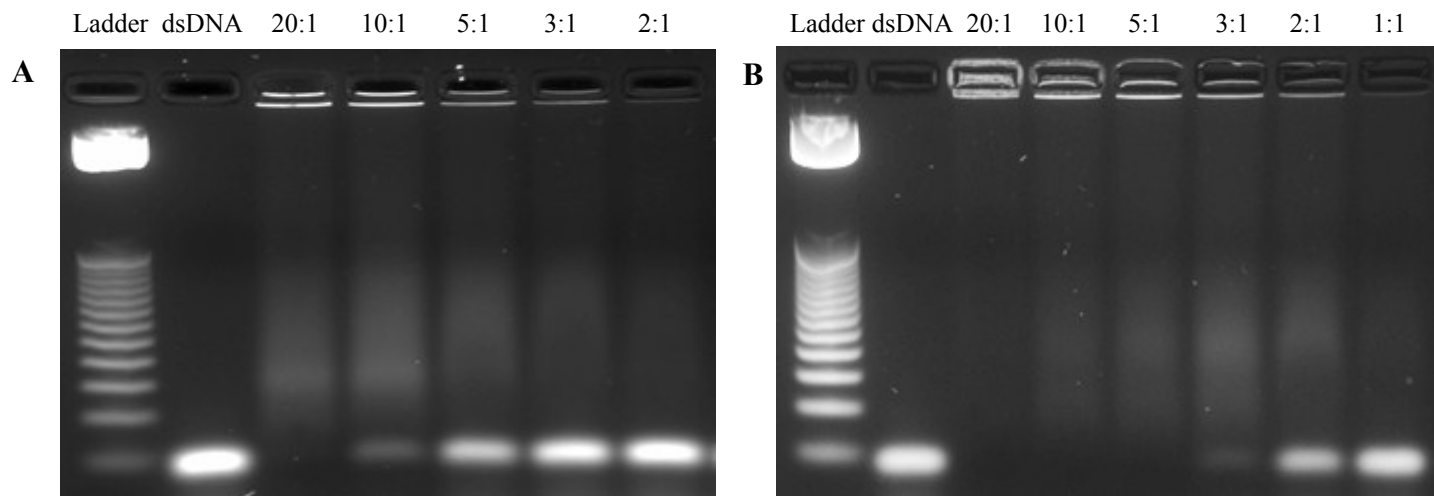

**Fig. S5** DNA-binding ability of MA-NP and MA-NS100-24 with the mass ratio of dsDNA to MA-NP (A) or MA-NS100-24 (B) in the range of 1:20~1:1, respectively.

**Table S1** Average particle size and polydispersity index (PDI) of some LDH nanosheets prepared by current method

| <b>Samples</b>                   | <b>Z-ave (nm)</b> | <b>PDI</b> |
|----------------------------------|-------------------|------------|
| <b>Ni<sub>2</sub>Al-NS-RT</b>    | 96.3              | 0.476      |
| <b>Co<sub>2</sub>Al-NS-RT</b>    | 69.9              | 0.283      |
| <b>Co<sub>2</sub>Fe-NS-RT</b>    | 165.5             | 0.261      |
| <b>Co<sub>2</sub>Al-NS100-72</b> | 183.2             | 0.543      |
| <b>Mg<sub>2</sub>Fe-NS-RT</b>    | 64.3              | 0.287      |
| <b>Fe<sub>2</sub>Al-NS-RT</b>    | 180.5             | 0.324      |
